# Supplementary material
Source: PubMed Central journal article supplement (PMC4437528)
Supplement: NIHMS690401-supplement.pdf [file NIHMS690401-supplement.pdf]

# Tubulation by amphiphysin requires concentration-dependent switching from wedging to scaffolding

J. Mario Isas<sup>1,\*</sup> and Mark R. Ambroso<sup>1,\*</sup>, Prabhavati B. Hegde<sup>1</sup>, Jennifer Langen<sup>2</sup>, Ralf Langen<sup>1,‡</sup>

<sup>1</sup>Zilkha Neurogenetic Institute, University of Southern California, Los Angeles, California 90033, USA.

<sup>2</sup>Department of Biological Sciences, University of Southern California, Los Angeles, CA 90089-2910, USA.

<sup>‡</sup>Corresponding Author: Ralf Langen, Zilkha Neurogenetic Institute, 1501 San Pablo St., 121 ZNI, Los Angeles, CA 90033. Tel.: 323-442-1323 Fax: 323-442-4404. Email [langen@usc.edu](mailto:langen@usc.edu)

## Supplemental Data

### Figure S1, related to Figure 1.

**EPR continuous wave spectra, as well as NiEDDA and O<sub>2</sub> accessibilities, of spin labeled derivatives of amphiphysin bound to 100 nm vesicles.**

(A) Continuous wave (CW) EPR spectra of spin labeled amphiphysin containing spin label R1 at position 13 in solution (black) and bound to vesicles (red). Sharp spectral lines indicate high spin label mobility in solution.

The broadened spectra for the vesicle bound form indicate reduced mobility. All other N-terminal labeling sites had similar spectra in solution indicating an unfolded structure.

(B) The CW EPR spectra of N-terminally spin labeled derivatives of amphiphysin when bound to vesicles.

(C) The N-terminal amino acid sequence of *Drosophila melanogaster* amphiphysin.

(D) Accessibility to oxygen (IIO<sub>2</sub>) and NiEDDA (IINiEDDA) as function of labeling position for vesicle bound amphiphysin. The periodicity in the respective accessibilities is indicative of  $\alpha$ -helical secondary conformation (Hubbell et al., 1998) and the out-of phase periodicity indicates that this helical structure is amphipathic.

(E) Lipids containing spin labels at known bilayer immersion depths (Bretscher et al., 2008; Dalton et al., 1987) were analyzed for accessibility to O<sub>2</sub> and NiEDDA in vesicles bound by non-spin labeled amphiphysin. These values were used to calibrate ( $\Phi$ ) with respect to membrane immersion depth (d) in Å (Altenbach et al., 1994). The values were fit to a hyperbolic tangent function (black line),  $\Phi = A \tanh[B(x-C)] + D$ , as previously described (Frazier et al., 2002), where A= 2.7, B= 0.08, C= 14, D= 2.5, and x is depth given in Å. Error bars represent SD, n = at least three independent experiments.

(F-G) CW EPR spectra of vesicle bound (red) and soluble (black) amphiphysin spin labeled in the BAR domain at the indicated positions, which are also shown in Figure 1A. High or low spectral amplitudes were rescaled using the indicated scaling factor (e.g., “2x”) for space considerations. Scan width is 100 gauss.

**Figure S2, related to Figure 2.**

**EPR continuous wave spectra, as well as NiEDDA and O<sub>2</sub> accessibilities, of spin labeled derivatives in the N-terminus of amphiphysin bound to lipid tubes.**

(A) CW EPR spectra of amphiphysin R1-labeled at position 13 in solution (black) and bound to tubes (red).

(B) CW EPR spectra of tube bound amphiphysin labeled with R1 at the indicated N-terminal sites.

(C) Accessibility to O<sub>2</sub> (ΠO<sub>2</sub>) and NiEDDA (ΠNiEDDA) as a function of labeling position for tube bound amphiphysin.

(D) Accessibility to O<sub>2</sub> and NiEDDA of spin labeled lipids in tubes formed by non-spin labeled amphiphysin were used to calibrate  $\Phi$  with respect to immersion depth (Altenbach et al., 1994). The values were fit to a hyperbolic tangent function (black line),  $\Phi = A \tanh[B(x-C)] + D$ , where  $A = 3.1$ ,  $B = 0.04$ ,  $C = 10$ ,  $D = 1.2$ , and  $x$  is depth given in Å. Error bars represent SD,  $n =$  at least three independent experiments.

**Figure S3, related to Figure 3.**

**Spin label mobility and accessibility for spin labeled amphiphysin bound to tubes or to vesicles.**

(A-B) CW EPR spectra of amphiphysin derivatives spin labeled in the BAR domain at the indicated positions in solution (black) or bound to tubes (red). High or low spectral amplitudes were rescaled using the indicated scaling factor (e.g., “2x”) for space considerations. Scan width is 100 gauss.

(C) The percent change in CW EPR spectral central line width for spin labeled amphiphysin derivatives bound to tubes or to vesicles is plotted versus residue number. Derivatives with a percent change in central line width greater than or equal to 10% (dashed line) are highlighted (green).

(D) Crystal structure of drosophila amphiphysin dimer (pdb, 1URU) indicating spin labeled derivatives with percent central line width changes greater than 10% in green as determined in (C). Residue numbers are given for only one subunit of the dimer.

(E) Plot of  $\Pi O_2$  versus  $\Pi NiEDDA$  for spin labeled sites in the BAR domain bound to tubes (black) or vesicles (red). Prior studies have shown that the accessibilities to  $O_2$  and NiEDDA are linearly related for proteins in solution (Isas et al, 2002). This is indeed the case for all sites in the BAR domain upon vesicle binding, in agreement with the notion that the BAR domain is too far from the membrane to experience enhanced  $O_2$  accessibility. In contrast, accessibility values for several tube bound derivatives do not fall into the same diagonal region delineated by the dashed lines. A number of sites fall below the dashed line as a consequence of enhanced  $O_2$  accessibility due to membrane proximity. The plot also shows that the enhanced  $\Phi$  values in Figure 3A are not due to the “excluded volume effect”. In very rare cases, enhanced  $\Phi$  values can be the consequences of the “excluded volume effect” in exceedingly immobilized regions (Isas et al., 2002). In such a scenario, sites may be very inaccessible to both  $O_2$  and NiEDDA, but due to its smaller size, accessibility to  $O_2$  is non-zero while accessibility to the larger molecule of NiEDDA is near zero. The plot indicates that this is not the case here.

78 **Table S1, related to Figures 1 and 3.**  
79 **O<sub>2</sub> and NiEDDA accessibilities for all of the spin labeled amphiphysin derivatives in vesicle or tube**  
80 **bound states.** Values are the average of at least 3 independent measurements.

81

82

83

84

85

**Figure S1**

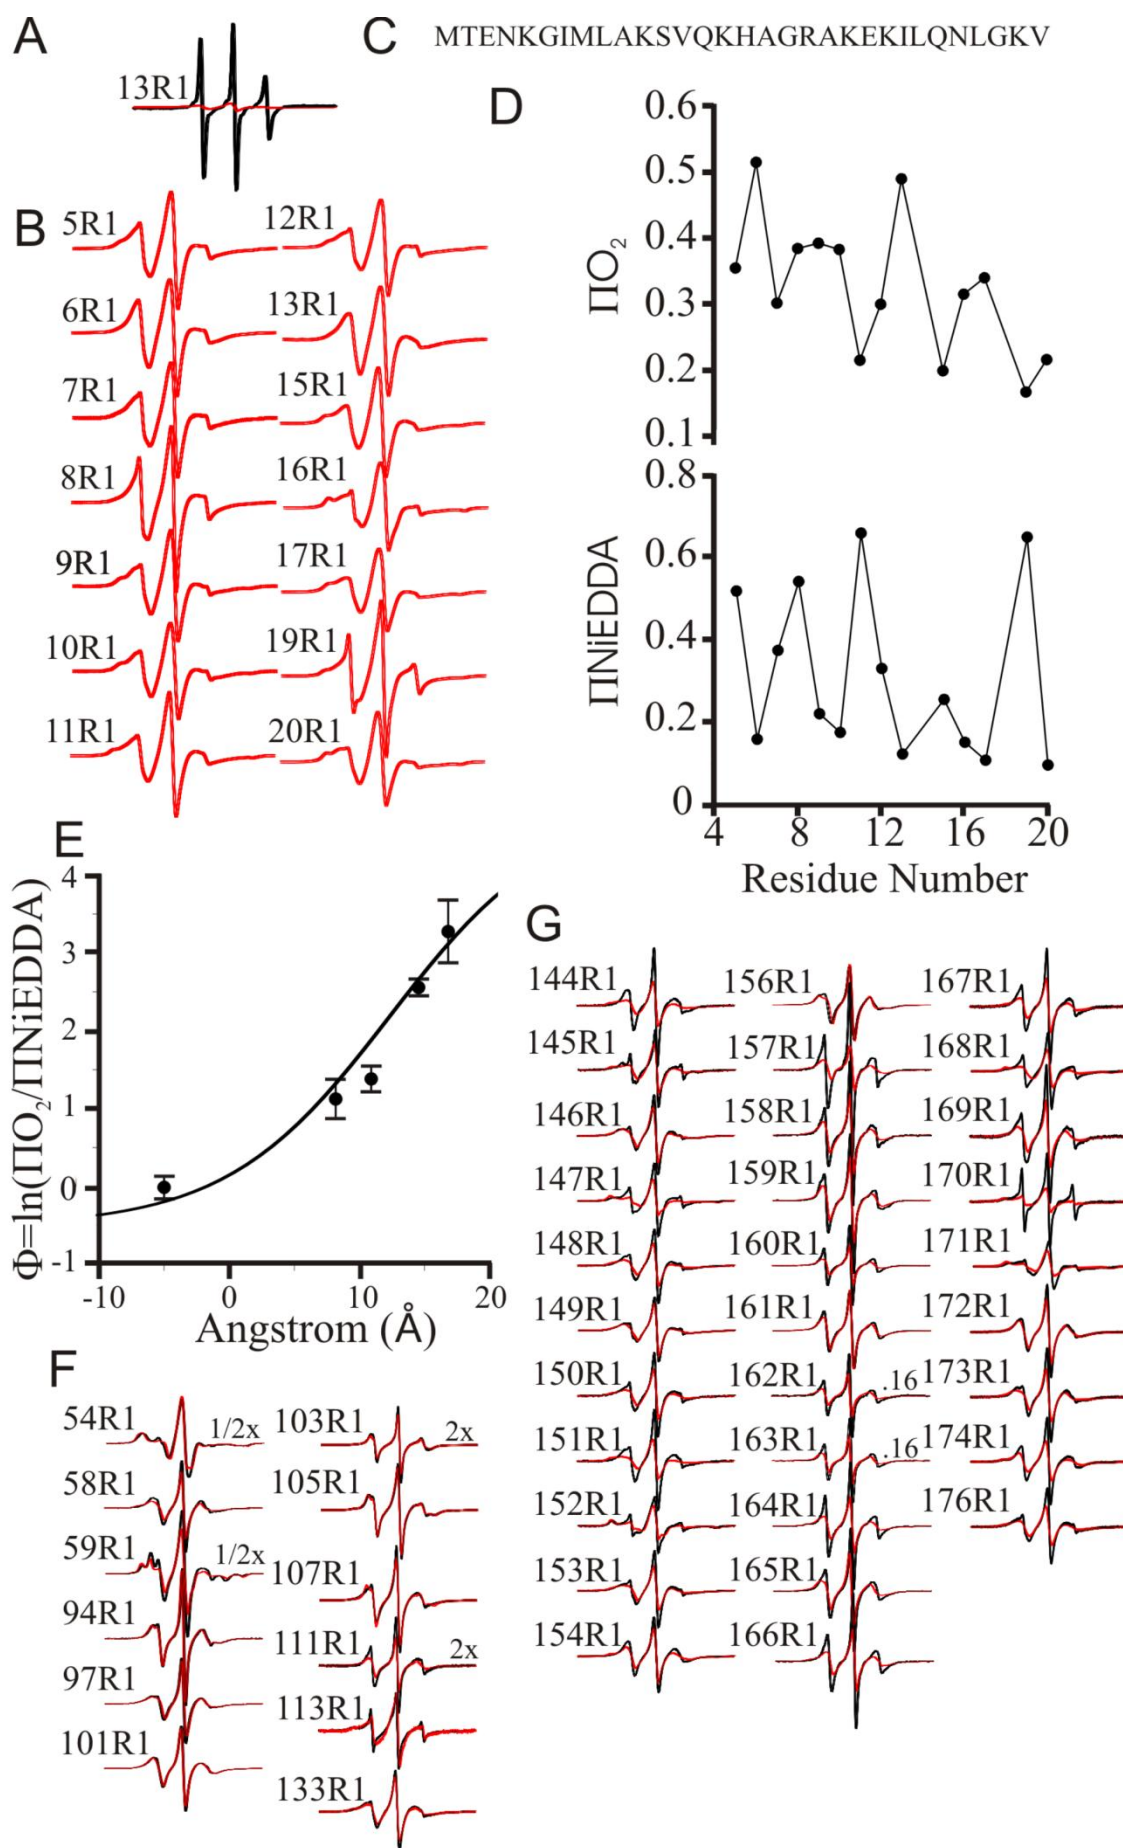

Figure S2

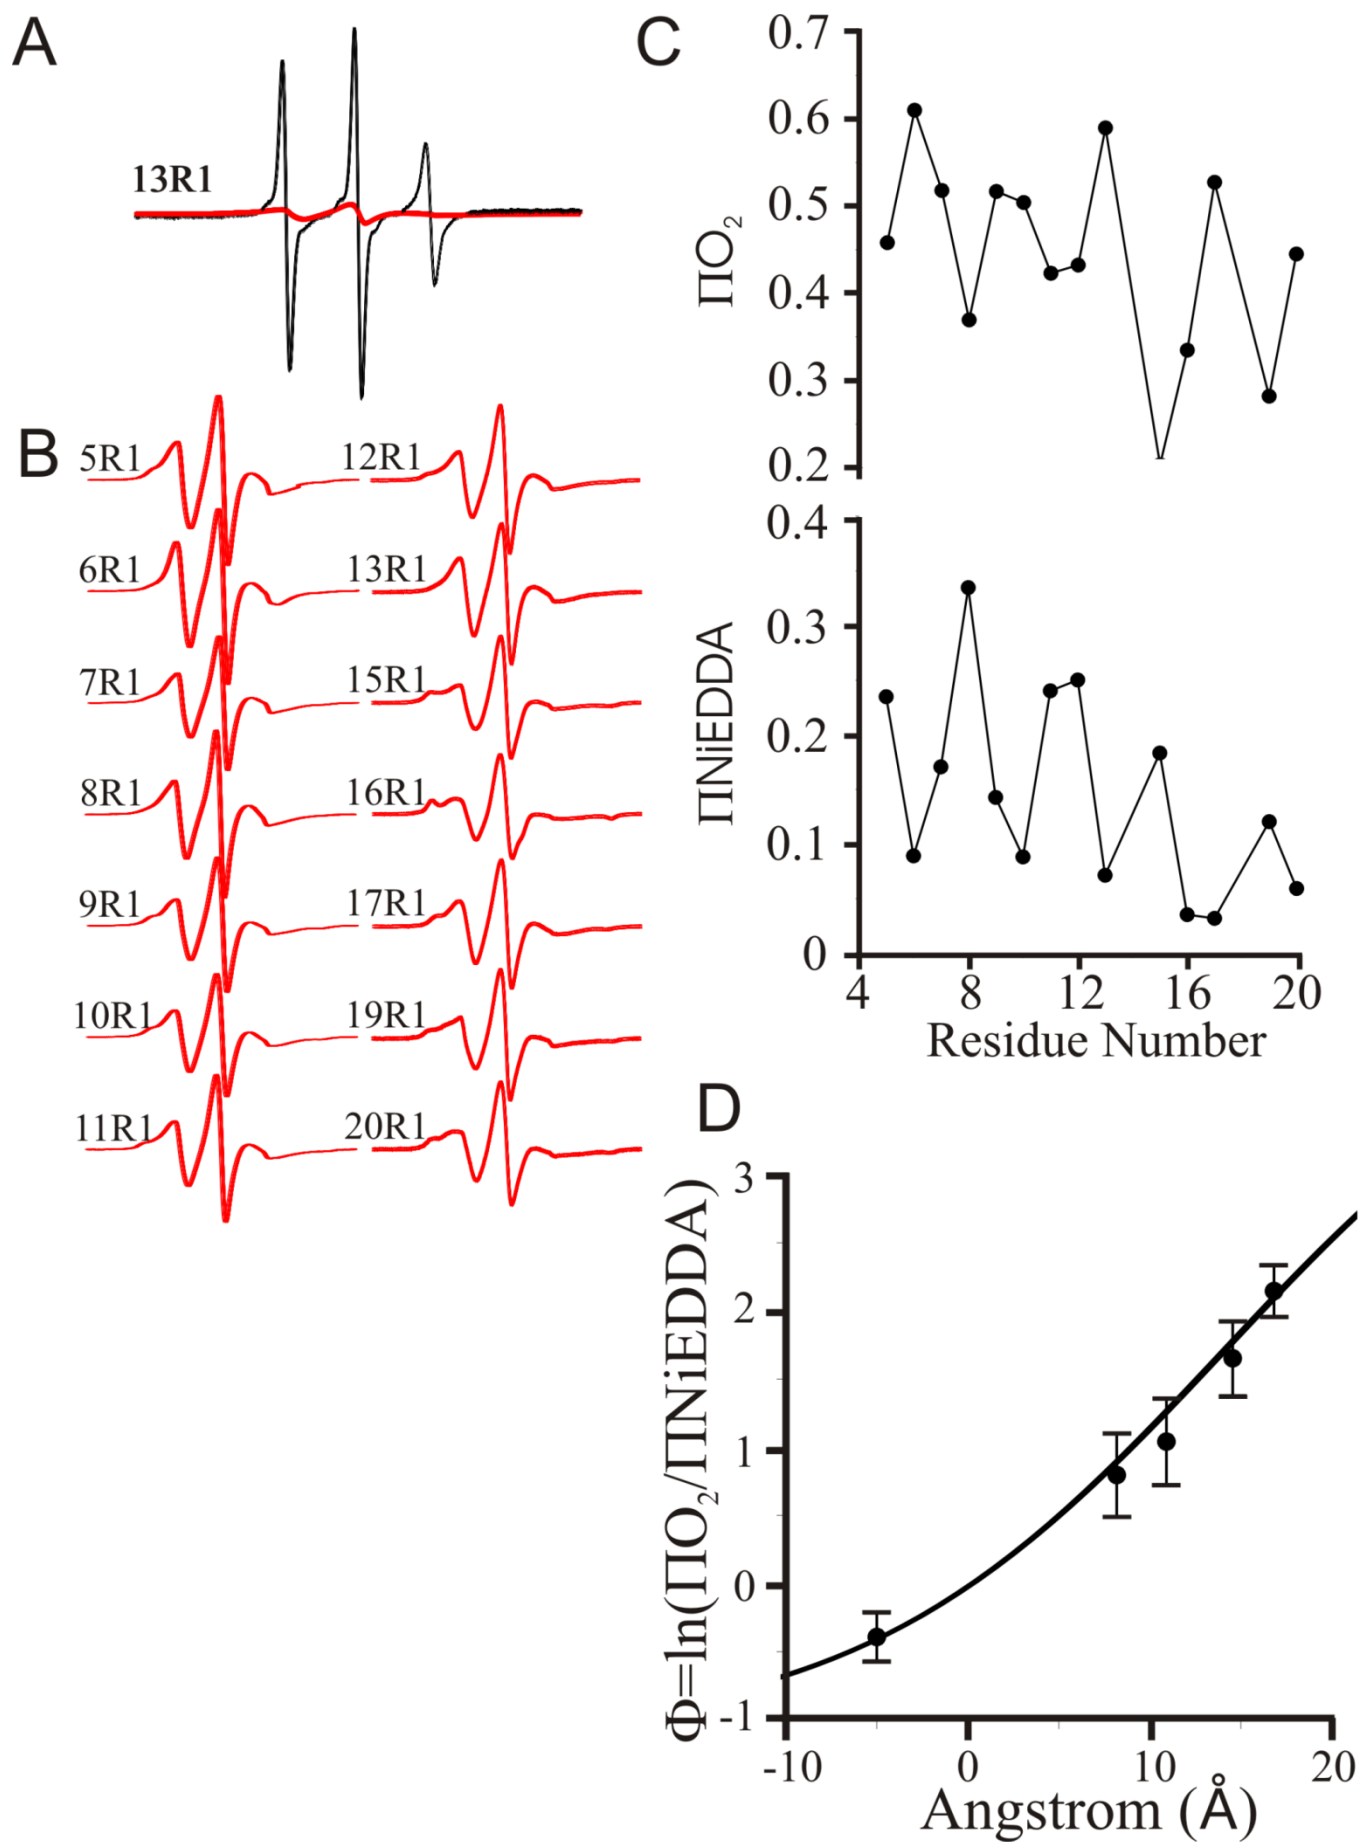

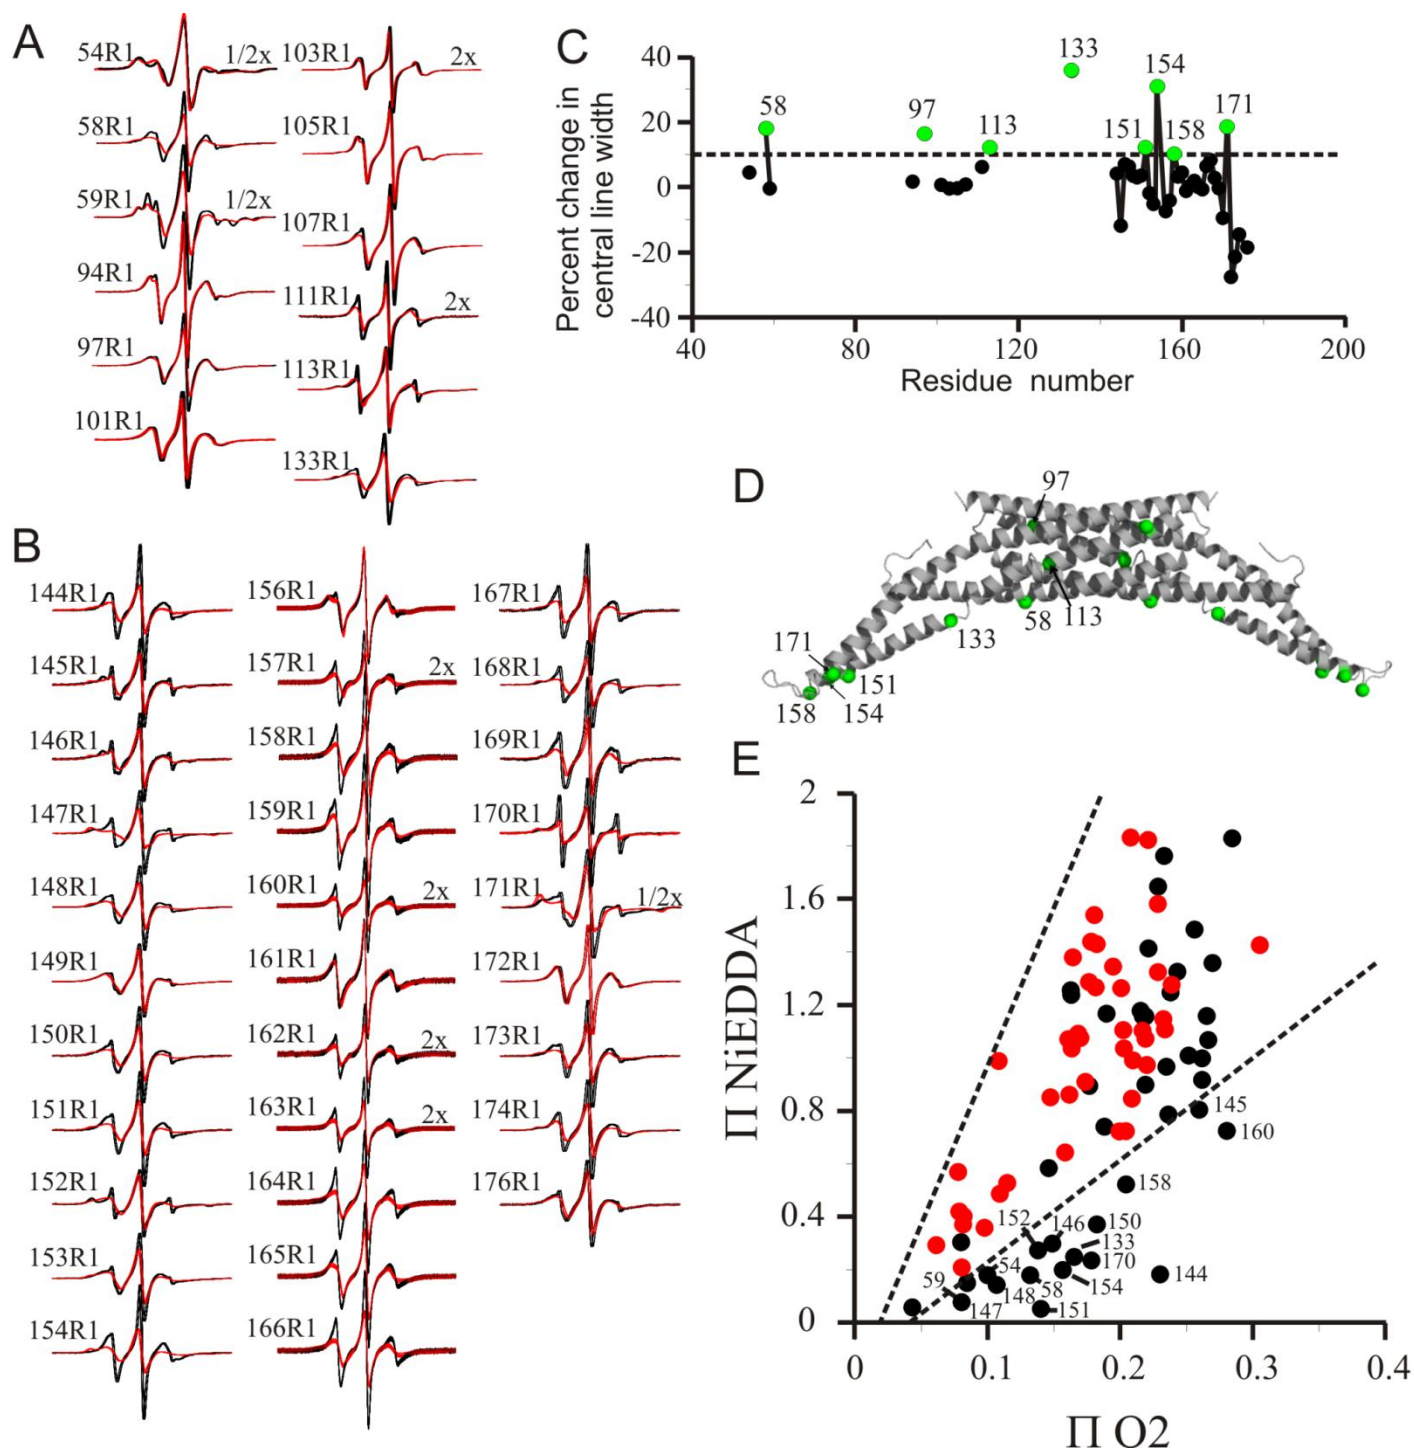

**Table S1**

| Spin<br>labeled<br>derivative | Tube-bound      |                    | Vesicle-bound   |                    |
|-------------------------------|-----------------|--------------------|-----------------|--------------------|
|                               | $\Pi\text{O}_2$ | $\Pi\text{NiEDDA}$ | $\Pi\text{O}_2$ | $\Pi\text{NiEDDA}$ |
| <b>5</b>                      | 0.46            | 0.23               | 0.36            | 0.52               |
| <b>6</b>                      | 0.61            | 0.09               | 0.52            | 0.16               |
| <b>7</b>                      | 0.52            | 0.17               | 0.30            | 0.37               |
| <b>8</b>                      | 0.37            | 0.33               | 0.39            | 0.54               |
| <b>9</b>                      | 0.52            | 0.09               | 0.39            | 0.18               |
| <b>10</b>                     | 0.50            | 0.09               | 0.39            | 0.18               |
| <b>11</b>                     | 0.42            | 0.24               | 0.22            | 0.66               |
| <b>12</b>                     | 0.43            | 0.25               | 0.30            | 0.33               |
| <b>13</b>                     | 0.59            | 0.07               | 0.49            | 0.12               |
| <b>15</b>                     | 0.20            | 0.18               | 0.20            | 0.26               |
| <b>16</b>                     | 0.33            | 0.04               | 0.32            | 0.15               |
| <b>17</b>                     | 0.53            | 0.03               | 0.34            | 0.11               |
| <b>19</b>                     | 0.28            | 0.12               | 0.17            | 0.65               |
| <b>20</b>                     | 0.45            | 0.06               | 0.22            | 0.10               |
| <b>54</b>                     | 0.10            | 0.18               | 0.08            | 0.40               |
| <b>58</b>                     | 0.13            | 0.18               | 0.18            | 1.29               |
| <b>59</b>                     | 0.08            | 0.15               | 0.08            | 0.42               |
| <b>94</b>                     | 0.27            | 1.36               | 0.22            | 1.10               |
| <b>97</b>                     | 0.19            | 1.17               | 0.31            | 1.43               |
| <b>101</b>                    | 0.27            | 1.07               | 0.23            | 1.11               |
| <b>103</b>                    | 0.16            | 1.25               | 0.16            | 1.03               |
| <b>105</b>                    | 0.22            | 1.16               | 0.21            | 0.99               |
| <b>107</b>                    | 0.22            | 1.41               | 0.23            | 1.15               |
| <b>111</b>                    | 0.23            | 1.65               | 0.18            | 1.43               |
| <b>113</b>                    | 0.24            | 1.25               | 0.21            | 0.85               |
| <b>133</b>                    | 0.17            | 0.25               | 0.17            | 0.91               |
| <b>144</b>                    | 0.23            | 0.18               | 0.11            | 0.49               |
| <b>145</b>                    | 0.26            | 0.80               | 0.20            | 0.72               |
| <b>146</b>                    | 0.15            | 0.30               | 0.16            | 0.64               |
| <b>147</b>                    | 0.08            | 0.08               | 0.08            | 0.21               |
| <b>148</b>                    | 0.11            | 0.14               | 0.10            | 0.36               |

Table S1 (continued)

|            |      |      |      |      |
|------------|------|------|------|------|
| <b>149</b> | 0.19 | 0.74 | 0.18 | 1.44 |
| <b>150</b> | 0.18 | 0.37 | 0.16 | 0.86 |
| <b>151</b> | 0.14 | 0.05 | 0.08 | 0.37 |
| <b>152</b> | 0.14 | 0.27 | 0.11 | 0.53 |
| <b>153</b> | 0.24 | 0.79 | 0.20 | 0.72 |
| <b>154</b> | 0.16 | 0.20 | 0.15 | 0.85 |
| <b>156</b> | 0.26 | 1.00 | 0.20 | 1.04 |
| <b>157</b> | 0.23 | 0.97 | 0.21 | 1.83 |
| <b>158</b> | 0.20 | 0.52 | 0.18 | 1.27 |
| <b>159</b> | 0.25 | 1.01 | 0.22 | 1.07 |
| <b>160</b> | 0.28 | 0.72 | 0.22 | 0.97 |
| <b>161</b> | 0.27 | 1.16 | 0.22 | 1.82 |
| <b>162</b> | 0.26 | 0.92 | 0.23 | 1.58 |
| <b>163</b> | 0.24 | 1.32 | 0.24 | 1.28 |
| <b>164</b> | 0.22 | 0.90 | 0.20 | 1.26 |
| <b>165</b> | 0.26 | 1.48 | 0.18 | 1.54 |
| <b>166</b> | 0.16 | 1.24 | 0.19 | 1.34 |
| <b>167</b> | 0.15 | 0.58 | 0.16 | 1.07 |
| <b>168</b> | 0.22 | 1.18 | 0.20 | 1.10 |
| <b>169</b> | 0.23 | 1.76 | 0.23 | 1.32 |
| <b>170</b> | 0.18 | 0.24 | 0.11 | 0.99 |
| <b>171</b> | 0.04 | 0.06 | 0.06 | 0.29 |
| <b>172</b> | 0.28 | 1.83 | 0.17 | 1.07 |
| <b>173</b> | 0.18 | 0.89 | 0.16 | 1.38 |
| <b>174</b> | 0.08 | 0.30 | 0.08 | 0.57 |
| <b>176</b> | 0.22 | 1.16 | 0.17 | 1.09 |

**Supplemental references:**

Altenbach, C., Greenhalgh, D.A., Khorana, H.G., and Hubbell, W.L. (1994). A collision gradient method to determine the immersion depth of nitroxides in lipid bilayers: application to spin-labeled mutants of bacteriorhodopsin. *Proc. Natl. Acad. Sci.* *91*, 1667–1671.

Bretscher, L.E., Buchaklian, A.H., and Klug, C.S. (2008). Spin-labeled lipid A. *Anal. Biochem.* *382*, 129–131.

Dalton, L.A., McIntyre, J.O., and Fleischer, S. (1987). Distance estimate of the active center of D-beta-hydroxybutyrate dehydrogenase from the membrane surface. *Biochemistry* *26*, 2117–2130.

Frazier, A.A., Roller, C.R., Havelka, J.J., Hinderliter, A., and Cafiso, D.S. (2003). Membrane-Bound Orientation and Position of the Synaptotagmin I C2A Domain by Site-Directed Spin Labeling. *Biochemistry* *42*, 96–105.

Hubbell, W.L., Gross, A., Langen, R., and Lietzow, M.A. (1998). Recent advances in site-directed spin labeling of proteins. *Curr. Opin. Struct. Biol.* *8*, 649–656.

Isas, J.M., Langen, R., Haigler, H.T., and Hubbell, W.L. (2002). Structure and Dynamics of a Helical Hairpin and Loop Region in Annexin 12: A Site-Directed Spin Labeling Study. *Biochemistry* *41*, 1464–1473.
